# Supplementary material
Source: HighWire-hosted journal article supplement (https://bmjopenquality.bmj.com/highwire/filestream/135977/field_highwire_adjunct_files/0/ds1602.pdf)
Supplement: ds1602.pdf [file ds1602.pdf]

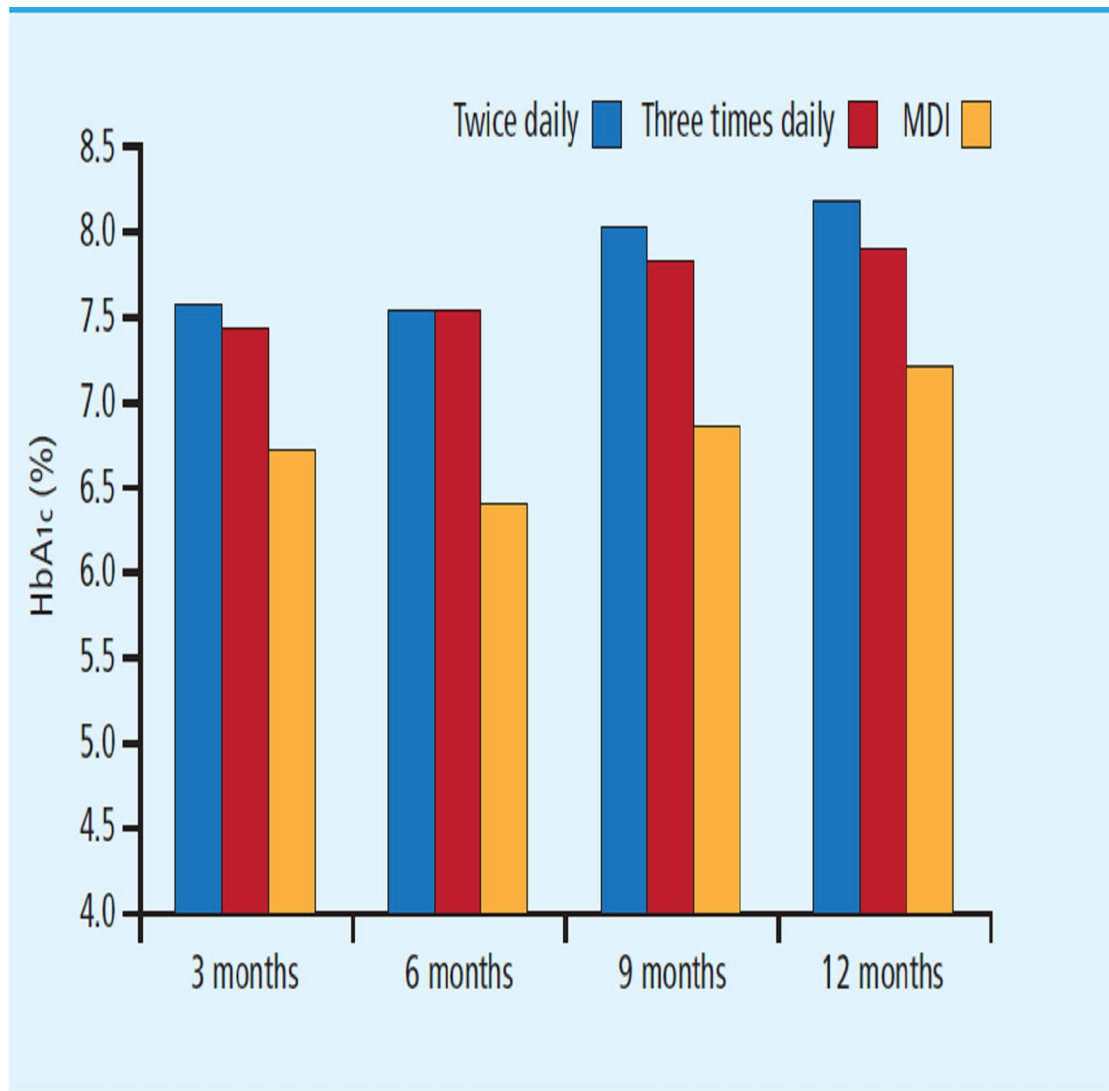

**Figure 1.** Mean HbA<sub>1c</sub> levels at 3, 6, 9 and 12 months from diagnosis in children under the age of 12 years in the Oxfordshire Children's Diabetes Service using different insulin regimens. There was a significant difference in HbA<sub>1c</sub> levels between MDI and bd and tds ( $p < 0.05$ ) at 3, 6 and 9 months
